# Supplementary material
Source: Springer Nature journal article supplement (https://www.springermedizin.de/resource/supplementary/12884_2006_98_MOESM5_ESM.pdf/9459616)
Supplement: MOESM5 [file 9459616]

The organization of  
MIGRATION AND REPRODUCTIVE HEALTH STUDIES

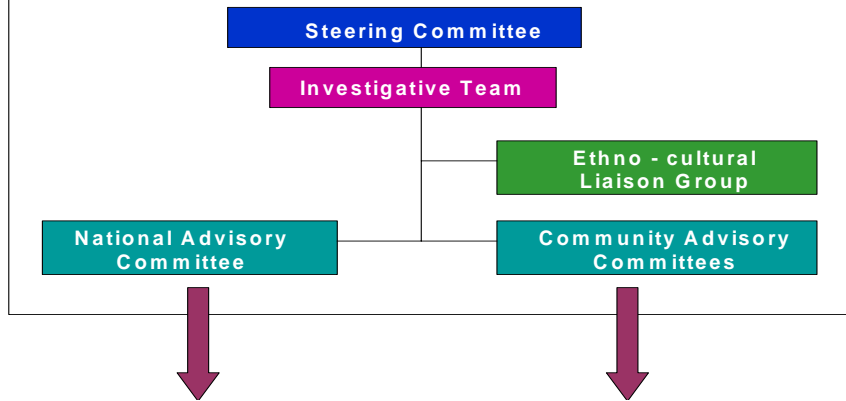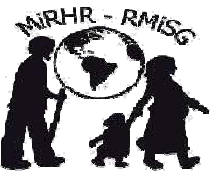

### National Advisory Committee (NAC)

Policy making/  
Government

*CIC*<sup>1</sup>  
*Canadian  
Heritage*

*PHAC*<sup>2</sup>

*Status of  
Women*

Professional

*AWHONN*<sup>3</sup>

*SOGC*<sup>4</sup>

*CPHA*<sup>5</sup>

NGOs

*NOIVMWC*<sup>6</sup>

*CCR*<sup>7</sup>

### Community Advisory Committee (CAC)

for Montreal (similar structure in Toronto & Vancouver)

Policy making/  
Government

*ASSS*<sup>8</sup>  
*Interpreter  
Services*

*MICC*<sup>9</sup>

*DSP*<sup>10</sup>

Professional

*Centre  
d'Accueil*

*SARIMM*<sup>11</sup>

*CLSC Côte  
des Neiges*

NGOs

*TCRI*<sup>12</sup>

*SAWCC*<sup>13</sup>

*Refuge Juan  
Moreno*
